# Supplementary material for: TREM2 Acts as a Tumor Suppressor in Colorectal Carcinoma through Wnt1/β-catenin and Erk Signaling
Source: PubMed Central journal article supplement (PMC6770495; doi:10.3390/cancers11091315), 2019-09-06
Supplement: cancers-11-01315-s001.pdf [file cancers-11-01315-s001.pdf]

## Supplementary Materials

Table S1. Real-time-PCR primer sequences.

| Gene          | Forward                         | Reverse                        |
|---------------|---------------------------------|--------------------------------|
| IL-1 $\beta$  | 5'-CAACCAACAAGTGATATTCTCCATG-3' | 5'-GATCCACACTCTCCAGCTGCA -3'   |
| IL-4          | 5'-ACAGGAGAAGGGACGCCAT-3'       | 5'-GAAGCCCTACAGACGAGCTCA-3'    |
| IL-6          | 5'-CCGGAGAGGAGACTTCACAG-3'      | 5'-CAGAATTGCCATTGCACAAC-3'     |
| IL-12         | 5'-ATGACCCTGTGCCTTGGTAG-3'      | 5'-CAGATAGCCCATCACCTGT-3'      |
| IL-15         | 5'-CATCCATCTCGTGCTACTTGTGTT-3'  | 5'-CATCTATCCAGTTGGCCTCTGTTT-3' |
| IL-17a        | 5'-TCAGACTACCTCAACCGTTCC-3'     | 5'-CTTTCCTCCGCATTGACAC-3'      |
| IL-21         | 5'-GCCAAACTCAAGCCATCAAACCC-3'   | 5'-CGAATCACAGGAAGGGCATTTAGC-3' |
| INF- $\gamma$ | 5'-TGGCATAGATGTGGAAGAAAAGAG-3'  | 5'-TGCAGGATTTTCATGTCACCAT-3'   |

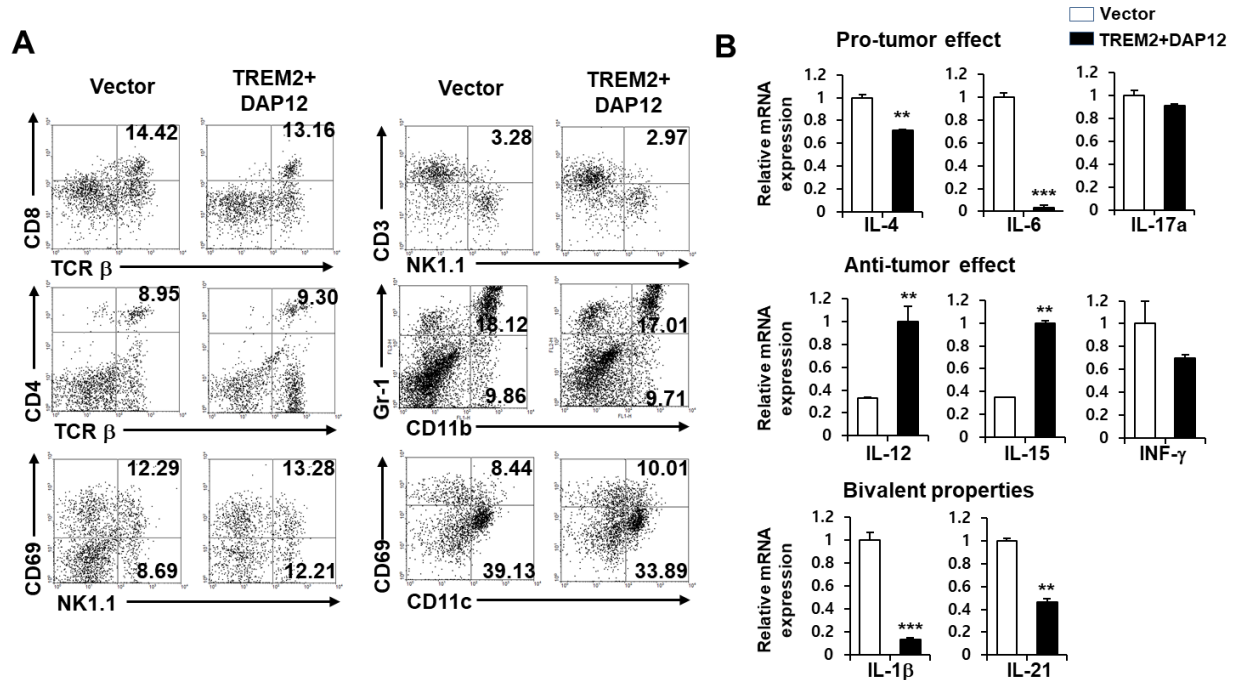

**Figure S1. Infiltrated immune cell distribution and cytokine mRNA expression in tumors.**

(A) Cells were isolated from tumors, and the immune cell population was determined by flow cytometry analysis using the indicated antibodies (CD4 T cells: CD4<sup>+</sup>TCR $\beta$ <sup>+</sup>; CD8 T cells: CD8<sup>+</sup>TCR $\beta$ <sup>+</sup>; NK cells: NK1.1<sup>+</sup>; NK T cells: NK1.1<sup>+</sup>CD3<sup>+</sup>; macrophages: CD11b<sup>+</sup>; granulocytes: CD11b<sup>+</sup>Gr-1<sup>+</sup>; dendritic cells: CD11c<sup>+</sup>; activation marker: CD69<sup>+</sup>). (B) cDNA was synthesized from tumor mRNA and analyzed by real-time PCR using the primers indicated in Table 1. The data are representative of three independent experiments (\*\*p<0.01, \*\*\*p<0.001).

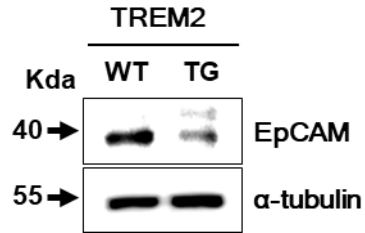

**Figure S2. Reduced protein expression of EpCAM in TREM2-TG mice compared with that in WT mice.** EpCAM expression was measured by western blot analysis using protein from the colon tissue of TREM2-TG and WT mice.
